# Supplementary material for: An intensive green emitting terbium complex using a newly designed aromatic hyperbranched polyester as an efficient antenna ligand
Source: Royal Society of Chemistry journal article supplement (doi:10.1039/c7tc02922e), 2017-01-01
Supplement: c7tc02922e1.pdf [file c7tc02922e1.pdf]

**Electronic Supplementary Information (ESI)**

**An intensive green emitting terbium complex using a newly designed aromatic hyperbranched polyester as efficient antenna ligand**

Dan Liu,<sup>\*a</sup> Yin-Ning Zhou,<sup>b</sup> Jilian Zhao,<sup>c</sup> Yaling Xu,<sup>a</sup> Jingfei Shen<sup>a</sup> and  
Minggang Wu<sup>a</sup>

<sup>a</sup> *College of Biological, Chemical Sciences and Engineering, Jiaying University, Jiaying, 314001, P. R. China. Email: liudan1029@126.com*

<sup>b</sup> *Department of Chemical Engineering, School of Chemistry and Chemical Engineering, Shanghai Jiao Tong University, Shanghai, 200240, P. R. China*

<sup>c</sup> *PetroChina Jilin Petrochemical Company Synthetic Resin Factory, Jilin, 132021, P. R. China*

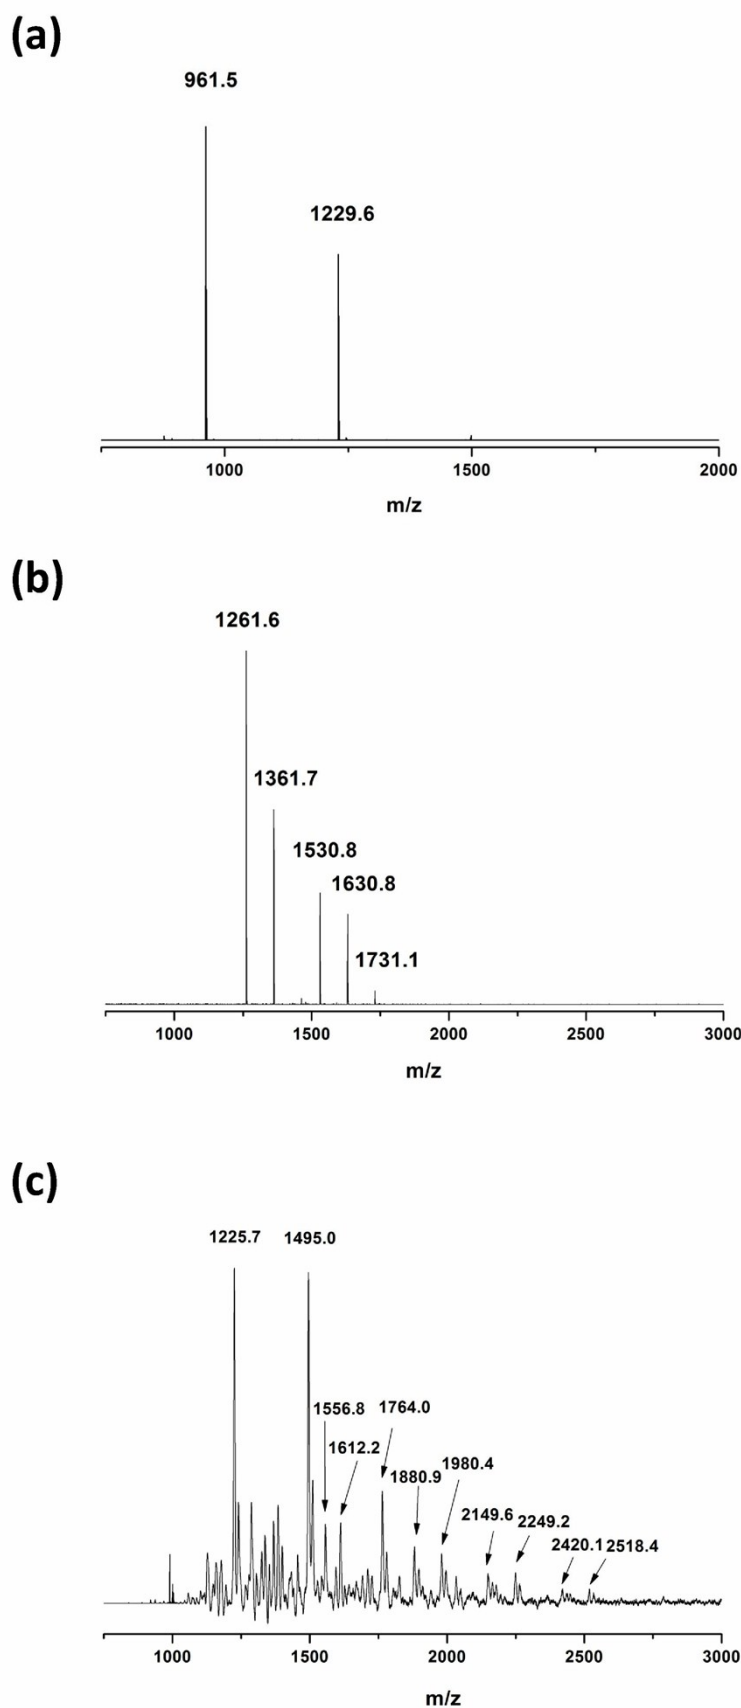

**Fig. S1** MALDI-TOF mass spectra of (a) HBPE, (b) CHBPE and (c) CHBPE-Tb<sup>3+</sup>-Phen.

Fig. S1a shows that HBPE is consisted of two molecular structures with different amount of hydroxyl end-groups as follows: six hydroxyl end-groups ( $m/z=961.5$   $[M+Na^+]$ ) and seven hydroxyl end-groups ( $m/z=1229.6$   $[M+Na^+]$ ).

Fig. S1b shows that CHBPE is consisted of five molecular structures with different amount of hydroxyl and carboxyl end-groups as follows: three hydroxyl end-groups and three carboxyl end-groups ( $m/z=1261.6$   $[M+Na^+]$ ), two hydroxyl end-groups and four carboxyl end-groups ( $m/z=1361.7$   $[M+Na^+]$ ), four hydroxyl end-groups and three carboxyl end-groups ( $m/z=1530.8$   $[M+Na^+]$ ), three hydroxyl end-groups and four carboxyl end-groups ( $m/z=1630.8$   $[M+Na^+]$ ), and two hydroxyl end-groups and five carboxyl end-groups ( $m/z=1731.1$   $[M+Na^+]$ ).

Compared to CHBPE, the MALDI-TOF MS of CHBPE-Tb<sup>3+</sup>-Phen shows more mass signals in the higher  $m/z$  regions, suggesting that there is complexation between Tb<sup>3+</sup> and ligands.

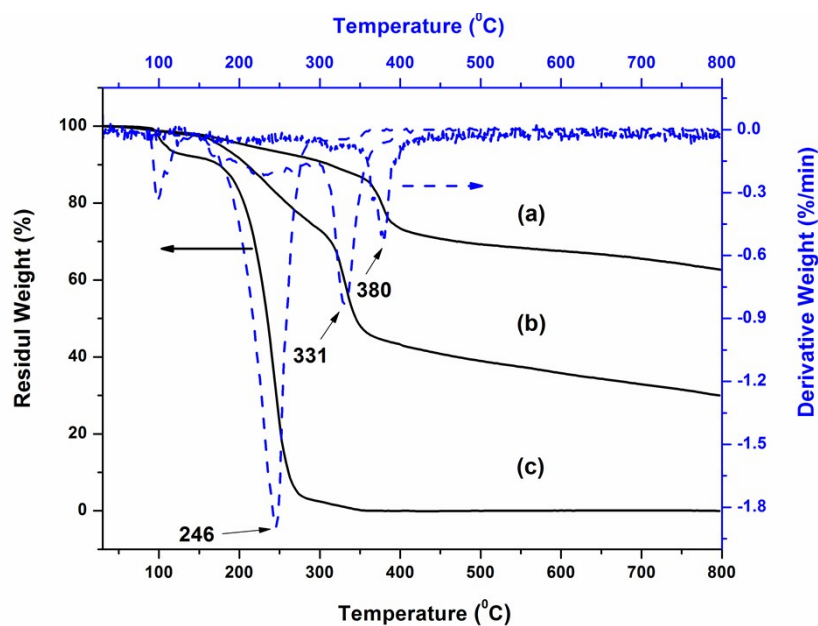

**Fig. S2** TGA and DTG curves (a) CHBPE-Tb<sup>3+</sup>-Phen, (b) CHBPE and (c) Phen·H<sub>2</sub>O.

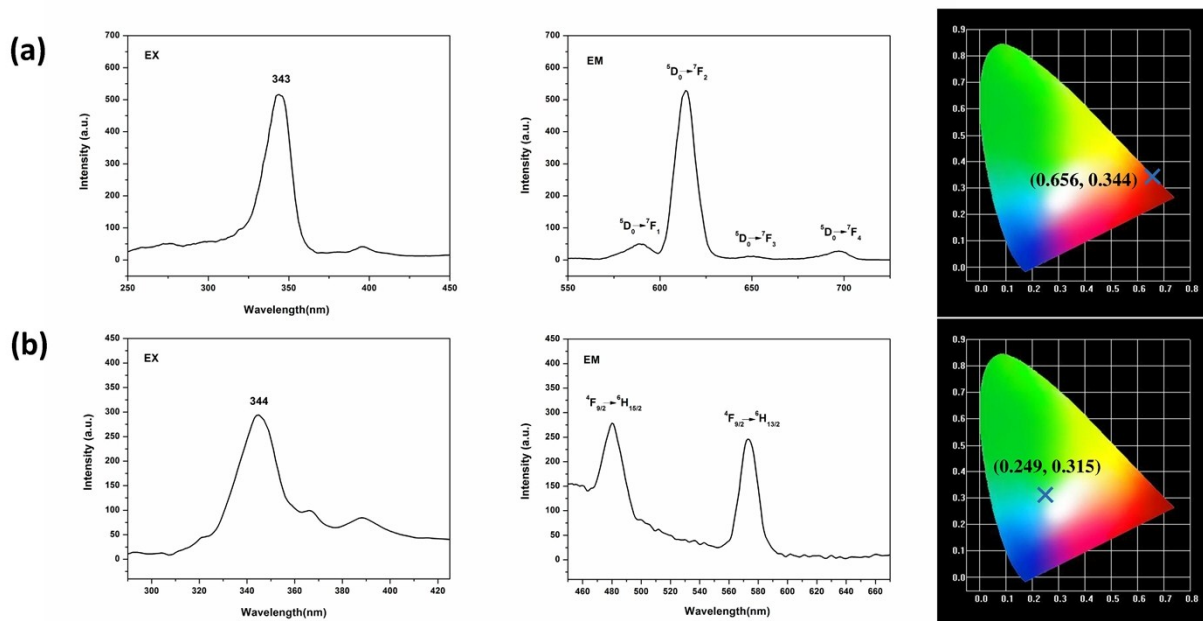

**Fig. S3** Excitation, emission spectra and CIE 1931 chromaticity diagrams of (a) CHBPE-Eu<sup>3+</sup>-Phen and (b) CHBPE-Dy<sup>3+</sup>-Phen. The concentration of the complexes in DMF was  $1 \times 10^{-4}$  mol/L.

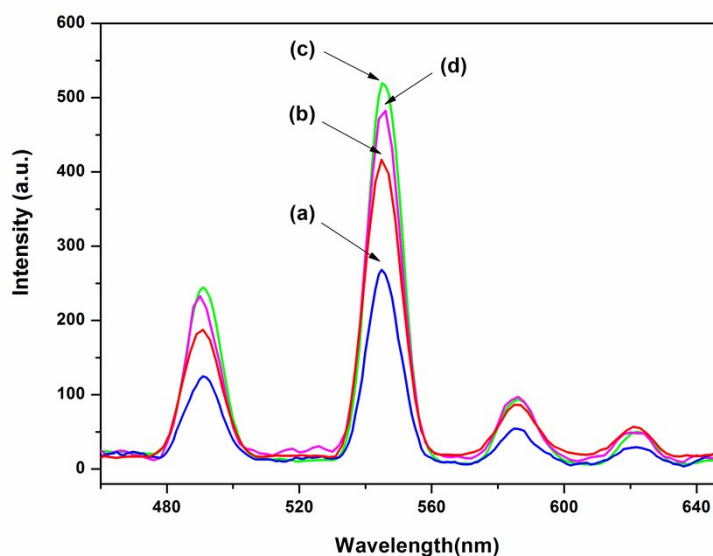

**Fig. S4** Emission spectra of CHBPE-Tb<sup>3+</sup>-Phen with the molar ratio of CHBPE to Phen of (a) 1:1, (b) 1:2, (c) 1:3 and (d) 1:4. The excitation wavelengths were 333 nm, 336 nm, 336 nm and 334 nm, respectively. The concentration of all the samples in DMF was  $1 \times 10^{-4}$  mol/L.

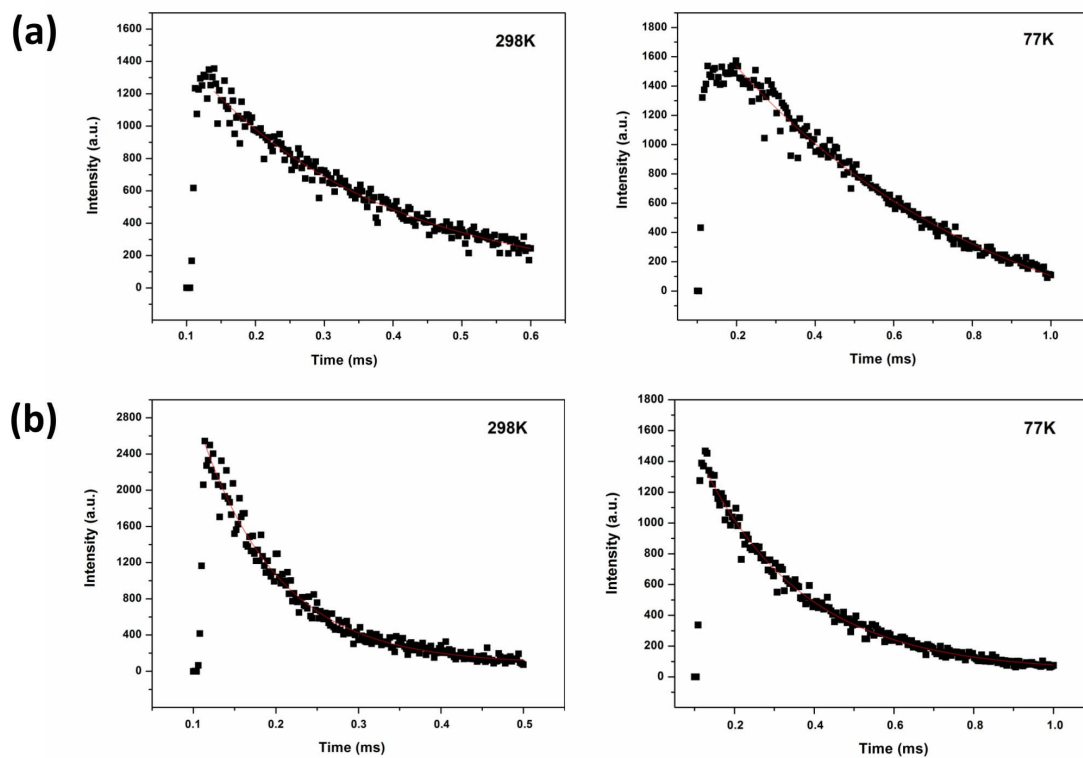

**Fig. S5** Luminescence decay profiles of (a) CHBPE-Tb<sup>3+</sup>-Phen and (b) CHBPE-Tb<sup>3+</sup> in the solid states at 298K and 77K, respectively.

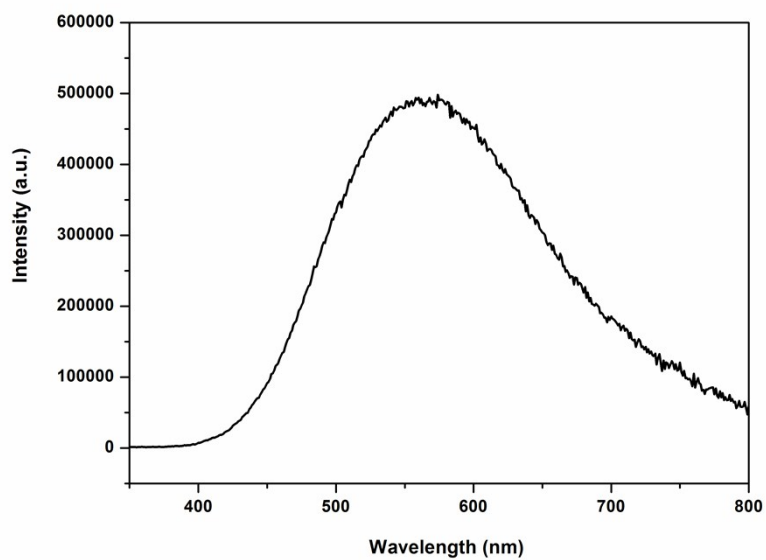

**Fig. S6** Phosphorescence of CHBPE-Gd<sup>3+</sup> in the solid state at 77K.
